# Supplementary material
Source: Springer Nature journal article supplement (https://www.springermedizin.de/resource/supplementary/12935_2012_345_MOESM13_ESM.pdf/9540332)

**(A) ET-770 (the compound 1a)**

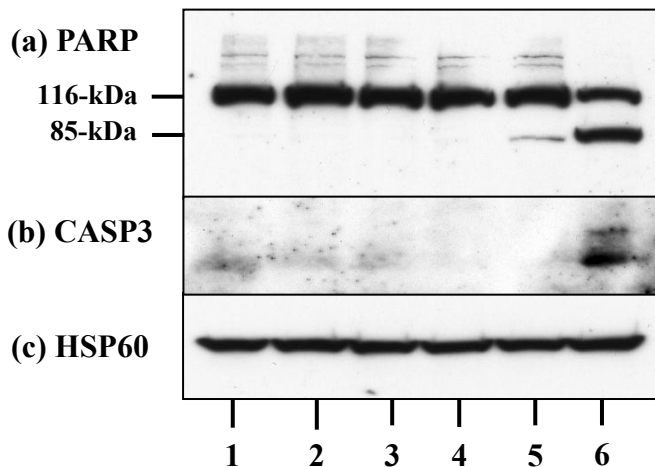

**(C) RM (the compound 2a)**

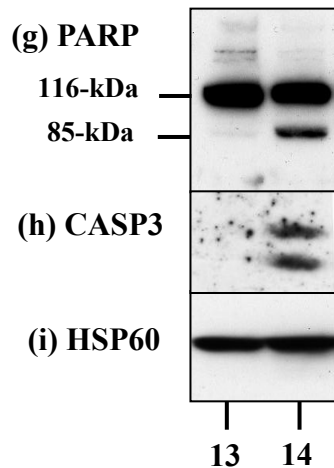

**(B) ET-770 derivative (the compound 3)**

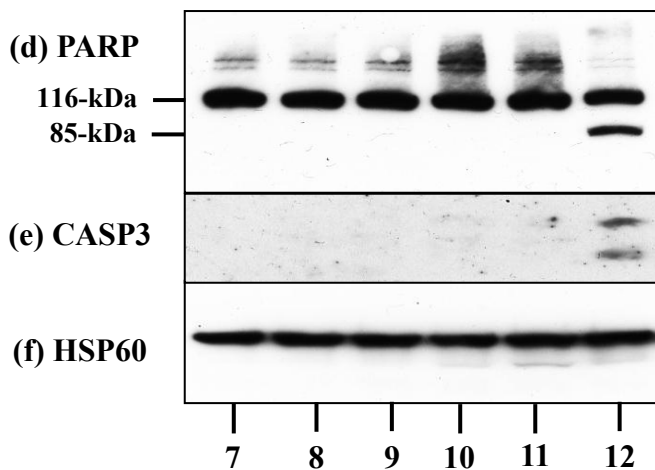

**(D) GSK3BI-VII**

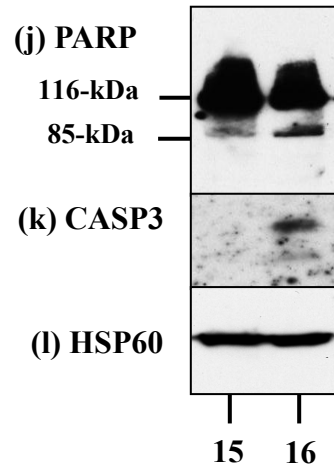

Supplement: MOESM13 [file 9540332]
